# Supplementary material for: Decarbonizing specialty chemical manufacturing: opportunities for electrochemists
Source: Royal Society of Chemistry journal article supplement (doi:10.1039/d4su00375f), 2024-12-10
Supplement: d4su00375f2.xlsx [file d4su00375f2.xlsx]

## Sheet: Figure 3,4b
Name of Compound	Molecular Formula	#Carbons	(-)Heat of Combustion (kJ/mol C)	GWP estimate (kgCO2/kg)	GWP reference
carbon dioxide + water	CO2 + H2O	0	0
methane	CH4	1	890	1.37	Argonne National Laboratory, Greenhouse gases, Regulated Emissions, and Energy use in Technologies (GREET) model, v.1.3.0. 13991, url: https://www.energy.gov/eere/greet, (ac-cessed June 2024)
ethylene	C2H4	2	705.5	1.44	Plastics Europe, “Eco-profiles for determining environmental impacts of plastics”, url:https://plasticseurope.org/sustainability/circularity/life-cycle-thinking/eco-profiles-set/, (accessed June 2024).
propylene	C3H4	3	686	1.44	Plastics Europe, “Eco-profiles for determining environmental impacts of plastics”, url:https://plasticseurope.org/sustainability/circularity/life-cycle-thinking/eco-profiles-set/, (accessed June 2024).
butane	C4H10	4	719.5	1.44	Plastics Europe, “Eco-profiles for determining environmental impacts of plastics”, url:https://plasticseurope.org/sustainability/circularity/life-cycle-thinking/eco-profiles-set/, (accessed June 2024).
maleic anhydride	C4H2O3	4	347.5	1.33	Argonne National Laboratory, Greenhouse gases, Regulated Emissions, and Energy use in Technologies (GREET) model, v.1.3.0. 13991, url: https://www.energy.gov/eere/greet, (ac-cessed June 2024)	B. Winter, R. Meys and A. Bardow, J. Cleaner Prod., 2021, 290,
isobutane	C4H10	4	717.25	N/A
benzene	C6H6	6	544.5	1.86	Plastics Europe, “Eco-profiles for determining environmental impacts of plastics”, url:https://plasticseurope.org/sustainability/circularity/life-cycle-thinking/eco-profiles-set/, (accessed June 2024).
acetylene	C2H2	2	650	2.63	Argonne National Laboratory, Greenhouse gases, Regulated Emissions, and Energy use in Technologies (GREET) model, v.1.3.0. 13991, url: https://www.energy.gov/eere/greet, (ac-cessed June 2024)
methanol	CH3OH	1	726	0.53	Argonne National Laboratory, Greenhouse gases, Regulated Emissions, and Energy use in Technologies (GREET) model, v.1.3.0. 13991, url: https://www.energy.gov/eere/greet, (ac-cessed June 2024)	Plastics Europe, “Eco-profiles for determining environmental impacts of plastics”, url:https://plasticseurope.org/sustainability/circularity/life-cycle-thinking/eco-profiles-set/, (accessed June 2024).
1-decene	C10H20	10	662	1.99	Argonne National Laboratory, Greenhouse gases, Regulated Emissions, and Energy use in Technologies (GREET) model, v.1.3.0. 13991, url: https://www.energy.gov/eere/greet, (ac-cessed June 2024)
acrylic acid	C3H4O2	3	456.333	1.21	Plastics Europe, “Eco-profiles for determining environmental impacts of plastics”, url:https://plasticseurope.org/sustainability/circularity/life-cycle-thinking/eco-profiles-set/, (accessed June 2024).
acetone	C3H6O	3	590.667	1.64	Plastics Europe, “Eco-profiles for determining environmental impacts of plastics”, url:https://plasticseurope.org/sustainability/circularity/life-cycle-thinking/eco-profiles-set/, (accessed June 2024).
cyclohexane	C6H12	6	655	2.3	Argonne National Laboratory, Greenhouse gases, Regulated Emissions, and Energy use in Technologies (GREET) model, v.1.3.0. 13991, url: https://www.energy.gov/eere/greet, (ac-cessed June 2024)
formaldehyde	C2H2O	1	571	0.69	Argonne National Laboratory, Greenhouse gases, Regulated Emissions, and Energy use in Technologies (GREET) model, v.1.3.0. 13991, url: https://www.energy.gov/eere/greet, (ac-cessed June 2024)
isobutylene	C4H8	4	675	1.98	Plastics Europe, “Eco-profiles for determining environmental impacts of plastics”, url:https://plasticseurope.org/sustainability/circularity/life-cycle-thinking/eco-profiles-set/, (accessed June 2024).
methyl-isobutyl ketone	C6H12O	6	615.833	6.5	A. Amelio, G. Genduso, S. Vreysen, P. Luis and B. V. der Bruggen, Green Chem., 2014, 16, 3045–3063.
cylcohexanone	C6H10O	6	586	4.2	A. Amelio, G. Genduso, S. Vreysen, P. Luis and B. V. der Bruggen, Green Chem., 2014, 16, 3045–3063.
methyl methacrylate	C5H8O2	5	545	3.47	Plastics Europe, “Eco-profiles for determining environmental impacts of plastics”, url:https://plasticseurope.org/sustainability/circularity/life-cycle-thinking/eco-profiles-set/, (accessed June 2024).
adipic acid	C6H10O	6	461.5	9.4	Argonne National Laboratory, Greenhouse gases, Regulated Emissions, and Energy use in Technologies (GREET) model, v.1.3.0. 13991, url: https://www.energy.gov/eere/greet, (ac-cessed June 2024)
1,4 butanediol	C4H10O2	4	624	3.76	Argonne National Laboratory, Greenhouse gases, Regulated Emissions, and Energy use in Technologies (GREET) model, v.1.3.0. 13991, url: https://www.energy.gov/eere/greet, (ac-cessed June 2024)
			Heat of combustion data retrieved from NIST, https://www.nist.gov/, accessed March 2024

## Sheet: Figure 4a
	WoS Hits
Year	Search 1	Search 2
1984	8	43		Search 1 terms:
1985	12	60		TITLE includes {"electrochem*" OR "electrosyn*"} AND {"CO2 "OR "carbon dioxide" OR "CO2RR"}
1986	15	61
1987	25	62		Search 2 terms:
1988	15	83		TITLE includes {"electrochemical syn*" OR "electrosyn*"} NOT {"CO2" OR "carbon dioxide" OR "CO2RR"}
1989	22	69
1990	24	74
1991	21	86
1992	18	86
1993	21	93
1994	30	92
1995	42	91
1996	26	109
1997	29	115
1998	46	137
1999	23	131
2000	19	105	<--------year used for normalization
2001	21	109
2002	31	99
2003	18	113
2004	13	102
2005	18	152
2006	16	134
2007	20	160
2008	30	168
2009	24	154
2010	29	158
2011	57	203
2012	50	205
2013	101	209
2014	124	225
2015	166	252
2016	197	223
2017	270	284
2018	311	252
2019	395	310
2020	415	388
2021	620	373
2022	648	413
2023	700	462

## Sheet: Figure 5- Adipic Acid
	coeffict	chemical	hf naut	s naut	mw	GWP Lower	GWP Upper	GWP Average	Range		temp	Delta G (kJ/mol)	Gibbs Free (kWh/ kg product)	CI (kg CO2/ kg Product)
1	1	Adipic Acid	-865	499.25	146.141	12.9	22.6				298	128.345	0.973075	0.291922
2	0	Cyclohexanol	-352	203.87	100.159	0	0
3	-1	Cyclohexanone	-272.6	229.03	98.143	0	0
4	-3	Water	-285	69.9	18.02	0	0
5	3	Hydrogen	0	130	2.016	0	0
6		Not Aval	0	0	0	0	0
			262.6	450.52				GWP of Step
								5.3
	mol product	mol desired product	mw desired	g/ kg	kwh / kj						Step	Gibbs	Efficiency	Carbon intensity electricity (kg CO2 / kWh)	CI 10% Efficiency	CI 33% Efficiency	CI 50% Efficiency	Industrial Intensity
	4	1	146.141	1000	0.000277									0	0	0	0	5.3	0
														0.01	0.0973075	0.0294871	0.0194615	5.3	0
											2	0.973075	0.1	0.05	0.486537	0.147436	0.0973075	5.3	0
													0.33	0.1	0.973075	0.294871	0.194615	5.3	0
													0.5	0.15	1.45961	0.442307	0.291922	5.3	0
														0.2	1.94615	0.589742	0.38923	5.3	0
												Titles		0.25	2.43269	0.737178	0.486537	5.3	0
												Cyclohexanone -> Adipic Acid		0.3	2.91922	0.884613	0.583845	5.3	0
												Carbon Intensity of Electricity kg CO2 / kWh		0.35	3.40576	1.03205	0.681152	5.3	0
												Kg CO2 per kg Adipic Acid		0.4	3.8923	1.17948	0.77846	5.3	0
												France		0.45	4.37884	1.32692	0.875767	5.3	0
												America		0.5	4.86537	1.47436	0.973075	5.3	0
												China		0.55	5.35191	1.62179	1.07038	5.3	0
														0.6	5.83845	1.76923	1.16769	5.3	0
														0.65	6.32499	1.91666	1.265	5.3
														0.7	6.81152	2.0641	1.3623	5.3
														0.75	7.29806	2.21153	1.45961	5.3
														0.8	7.7846	2.35897	1.55692	5.3
														0.85	8.27113	2.5064	1.65423	5.3
														0.9	8.75767	2.65384	1.75153	5.3
														0.95	9.24421	2.80128	1.84884	5.3
														1	9.73075	2.94871	1.94615	5.3

## Sheet: Figure 5- Formaldehyde
	coeffict	chemical	hf naut	s naut	mw	GWP Lower	GWP Upper	GWP Average	Range		temp	Delta G (kJ/mol)	Gibbs Free (kWh/ kg product)	CI (kg CO2/ kg Product)
1	1	Formaldehyde	-115	218	30.03	0	0				298	57.142	1.58125	0.474376
2	1	Hydrogen	0	130	2.016	0	0
3	-1	Methanol	-238	127	32.04	0	0
4		Not Aval	0	0	0	0	0
5		Not Aval	0	0	0	0	0
6		Not Aval	0	0	0	0	0
			123	221				GWP of Step
								0.16
	mol product	mol desired product	mw desired	g/ kg	kwh / kj						Step	Gibbs	Efficiency	Carbon intensity electricity (kg CO2 / kWh)	CI 10% Efficiency	CI 33% Efficiency	CI 50% Efficiency	Industrial Intensity
	3	1	30.03	1000	0.000277									0	0	0	0	0.16	0
														0.01	0.158125	0.0479167	0.031625	0.16	0
											2	1.58125	0.1	0.05	0.790626	0.239584	0.158125	0.16	0
								28.571					0.33	0.1	1.58125	0.479167	0.31625	0.16	0
													0.5	0.15	2.37188	0.718751	0.474376	0.16	0
														0.2	3.1625	0.958335	0.632501	0.16	0
												Titles		0.25	3.95313	1.19792	0.790626	0.16	0
												Methanol-> Formaldehyde		0.3	4.74376	1.4375	0.948751	0.16	0
												Carbon Intensity of Electricity kg CO2 / kWh		0.35	5.53438	1.67709	1.10688	0.16	0
												Kg CO2 per kg Formaldehyde		0.4	6.32501	1.91667	1.265	0.16	0
												France		0.45	7.11563	2.15625	1.42313	0.16	0
												America		0.5	7.90626	2.39584	1.58125	0.16	0
												China		0.55	8.69689	2.63542	1.73938	0.16	0
														0.6	9.48751	2.875	1.8975	0.16	0
														0.65	10.2781	3.11459	2.05563	0.16
														0.7	11.0688	3.35417	2.21375	0.16
														0.75	11.8594	3.59375	2.37188	0.16
														0.8	12.65	3.83334	2.53	0.16
														0.85	13.4406	4.07292	2.68813	0.16
														0.9	14.2313	4.31251	2.84625	0.16
														1	15.8125	4.79167	3.1625	0.16

## Sheet: Figure 5- Methanol
		CO2+ 2H2O-->CH3OH +3/2O2
	coeffict	chemical	hf naut	s naut	mw	GWP Lower	GWP Upper	GWP Average	Range		temp	Delta G (kJ/mol)	Gibbs Free (kWh/ kg product)	CI (kg CO2/ kg Product)
1	-1	CO2	-393.5	213.51	44.01	0	0				298	701.238	15.6446	18.7735
2	-2	Water	-285	69.9	18.02	0	0
3	1	Methanol	-238	127	32.04	0	0
4	1.5	Oxygen	0	205.15	0	0	0
5		Not Aval	0	0	0	0	0
6		Not Aval	0	0	0	0	0
			725.5	81.415				GWP of Step
								0.53
	mol product	mol desired product	mw desired	g/ kg	kwh / kj						Step	Gibbs	Efficiency	Carbon intensity electricity (kg CO2 / kWh)	CI 10% Efficiency	CI 33% Efficiency	CI 50% Efficiency	Industrial Intensity
	2.5	1	31.04	1000	0.000277													0.53	0
														0.01	1.56446	0.474078	0.312891	0.53	0
											2	15.6446	0.1	0.05	7.82229	2.37039	1.56446	0.53	0
													0.33	0.1	15.6446	4.74078	3.12891	0.53	0
													0.5	0.15	23.4669	7.11117	4.69337	0.53	0
														0.2	31.2891	9.48156	6.25783	0.53	0
												Titles		0.25	39.1114	11.8519	7.82229	0.53	0
												Reactant -> Adipic		0.3	46.9337	14.2223	9.38674	0.53	0
												Carbon Intensity of Electricity kg CO2 / kWh		0.35	54.756	16.5927	10.9512	0.53	0
												Kg CO2 per kg Product		0.4	62.5783	18.9631	12.5157	0.53	0
												France		0.45	70.4006	21.3335	14.0801	0.53	0
												America		0.5	78.2229	23.7039	15.6446	0.53	0
												China		0.55	86.0452	26.0743	17.209	0.53	0
														0.6	93.8674	28.4447	18.7735	0.53	0
														0.65	101.69	30.8151	20.3379	0.53
														0.7	109.512	33.1855	21.9024	0.53
														0.75	117.334	35.5558	23.4669	0.53
														0.8	125.157	37.9262	25.0313	0.53
														0.85	132.979	40.2966	26.5958	0.53
														0.9	140.801	42.667	28.1602	0.53
														0.95	148.623	45.0374	29.7247	0.53
														1	156.446	47.4078	31.2891	0.53

## Sheet: Figure S3
Need to find $/energy unit (BTU/MWh) for NG
Henry Hub has these numbers: https://www.eia.gov/dnav/ng/hist/rngwhhdM.htm
Same for
29.9988	29.3856	28.7732	28.1617	27.5511	26.9412	26.3322	25.7241	25.1167	24.5102	23.9045	23.8006	23.6968	23.5932	23.4896	23.3862	23.283	23.1798	23.0768	22.9739	22.8711	22.7685	22.666	22.5636	22.4614	22.3592	22.2572	22.1554	22.0536	21.952	21.8505
1 MMBTU = 0.293071 MWh
Year	$/Million BTU	$/MWh			Onshore Wind Speed Class 4 - Technology 1, Conservative	Utility PV, Class 5: GHI (global horizontal irradiance) of 4.75–5 kWh/m2/day, Conservative Estimate	Utility-Scale PV-Plus-Battery: Class 5: GHI of 4.75–5 kWh/m2/day
1997-06-30	2.49	8.49623	14.2817	2020	29.9988	38.7971	63.9888
1998-06-30	2.09	7.13138	14	2021	29.3856	34.2922	61.142
1999-06-30	2.27	7.74556	14	2022	28.7732	34.2083	60.1058
2000-06-30	4.31	14.7063	14	2023	28.1617	34.1276	59.0701
2001-06-30	3.96	13.5121	14	2024	27.5511	34.0472	58.0349
2002-06-30	3.38	11.533	14	2025	26.9412	33.9671	57.0002
2003-06-30	5.47	18.6644	14	2026	26.3322	33.8873	55.9659
2004-06-30	5.89	20.0975	14	2027	25.7241	33.8079	54.9321
2005-06-30	8.69	29.6515	14	2028	25.1167	33.7288	53.8988
2006-06-30	6.73	22.9637	14	2029	24.5102	33.65	52.8659
2007-06-30	6.97	23.7826	14	2030	23.9045	33.5715	51.8334
2008-06-30	8.86	30.2316	14	2031	23.8006	32.8496	50.8945
2009-06-30	3.94	13.4438	14	2032	23.6968	32.1362	49.9661
2010-06-30	4.37	14.9111	14	2033	23.5932	31.4312	49.0481
2011-06-30	4	13.6486	14	2034	23.4896	30.7343	48.1403
2012-06-30	2.75	9.38339	14	2035	23.3862	30.0455	47.2425
2013-06-30	3.73	12.7273	14	2036	23.283	29.3647	46.3546
2014-06-30	4.37	14.9111	14	2037	23.1798	28.6916	45.4763
2015-06-30	2.62	8.93981	14	2038	23.0768	28.0261	44.6077
2016-06-30	2.52	8.5986	14	2039	22.9739	27.3682	43.7484
2017-06-30	2.99	10.2023	14	2040	22.8711	26.7177	42.8983
2018-06-30	3.15	10.7482	14	2041	22.7685	26.0744	42.0573
2019-06-30	2.56	8.73508	14	2042	22.666	25.4383	41.2253
2020-06-30	2.03	6.92665	14	2043	22.5636	24.8092	40.4021
2021-06-30	3.89	13.2732	14	2044	22.4614	24.1871	39.5875
2022-06-30	6.45	22.0083	14	2045	22.3592	23.5717	38.7815
2023-06-30	2.53	8.63272	14	2046	22.2572	22.963	37.9839
			14	2047	22.1554	22.3609	37.1945
			14	2048	22.0536	21.7653	36.4133
			14	2049	21.952	21.1761	35.64
			14	2050	21.8505	20.5931	35
